# Supplementary material
Source: publisher figshare collection journal article supplement (https://diabetesjournals.figshare.com/articles/dataset/_/25130252)
Supplement: Supplementary file 1 [file 1]

Supplemental Table 1. Baseline characteristics for the overall DPP cohort and stratified by inclusion in the analytic sample.

|                                    | Overall             | Analytic Cohort     | Unavailable for Analysis | Active but Missing DSPN Data* |
|------------------------------------|---------------------|---------------------|--------------------------|-------------------------------|
| N                                  | 3234                | 1792                | 1442                     | 639                           |
| Assignment (%)                     |                     |                     |                          |                               |
| Placebo                            | 1082 (33.5)         | 597 (33.3)          | 485 (33.6)               | 227 (35.5)                    |
| Lifestyle                          | 1079 (33.4)         | 582 (32.5)          | 497 (34.5)               | 211 (33.0)                    |
| Metformin                          | 1073 (33.2)         | 613 (34.2)          | 460 (31.9)               | 201 (31.5)                    |
| Age (years)                        | 50.61 (10.68)       | 49.36 (9.10)        | 52.15 (12.20)            | 50.74 (11.03)                 |
| Sex = Female (%)                   | 2191 (67.7)         | 1265 (70.6)         | 926 (64.2)               | 444 (69.5)                    |
| Race/Ethnicity (%)                 |                     |                     |                          |                               |
| White                              | 1768 (54.7)         | 912 (50.9)          | 856 (59.4)               | 368 (57.6)                    |
| Black                              | 645 (19.9)          | 367 (20.5)          | 278 (19.3)               | 133 (20.8)                    |
| Hispanic                           | 508 (15.7)          | 296 (16.5)          | 212 (14.7)               | 96 (15.0)                     |
| Asian                              | 142 (4.4)           | 91 (5.1)            | 51 (3.5)                 | 19 ( 3.0)                     |
| American Indian                    | 171 (5.3)           | 126 (7.0)           | 45 (3.1)                 | 23 ( 3.6)                     |
| Ever smoker (%)                    | 1337 (41.3)         | 684 (38.2)          | 653 (45.3)               | 272 (42.6)                    |
| Alcohol Drinks/Week (%)            |                     |                     |                          |                               |
| None                               | 1772 (55.8)         | 975 (55.5)          | 797 (56.2)               | 372 (59.6)                    |
| < 1 per week                       | 608 (19.1)          | 331 (18.8)          | 277 (19.5)               | 126 (20.2)                    |
| 1 - 7 per week                     | 647 (20.4)          | 369 (21.0)          | 278 (19.6)               | 102 (16.3)                    |
| > 7 per week                       | 148 (4.7)           | 83 (4.7)            | 65 (4.6)                 | 24 ( 3.8)                     |
| Weight (kg)                        | 94.2 (20.3)         | 92.7 (19.0)         | 96.1 (21.6)              | 96.25 (22.1)                  |
| Height (m)                         | 166.4 (9.2)         | 166.0 (9.0)         | 167.1 (9.4)              | 166.56 (9.20)                 |
| EGFR (mL/min/1.73 m <sup>2</sup> ) | 98.4 (16.6)         | 99.2 (15.9)         | 97.5 (17.4)              | 98.96 (16.8)                  |
| Triglycerides (mg/dL)**            | 141.0 [99.0, 201.0] | 143.0 [99.5, 200.0] | 139.0 [99.0, 201.0]      | 139.00 [99.00, 199.50]        |
| HbA1c (%)                          | 5.9 (0.5)           | 5.9 (0.5)           | 5.9 (0.5)                | 5.92 (0.52)                   |

\*These 639 subjects are a subset of the 1442 who were enrolled in DPPOS and were still alive at the visit at which DSPN was ascertained.

\*\*Median [IQR]

Supplemental Table 2. Estimated odds ratios (95% confidence intervals) from logistic regression models with presence of DSPN as the response.

|                    | Model 1              | Model 2              | Model 3              | Model 4              | Model 5              |
|--------------------|----------------------|----------------------|----------------------|----------------------|----------------------|
| ILS                | 0.95 (0.71, 1.26)    | 0.92 (0.68, 1.25)    | 0.93 (0.69, 1.27)    | 0.97 (0.72, 1.32)    | 0.95 (0.70, 1.29)    |
| Metformin          | 0.92 (0.69, 1.22)    | 0.94 (0.70, 1.26)    | 0.93 (0.69, 1.25)    | 1.05 (0.78, 1.41)    | 0.97 (0.72, 1.30)    |
| Age (1 year)       | 1.05*** (1.03, 1.06) | 1.07*** (1.05, 1.09) | 1.07*** (1.05, 1.09) | 1.08*** (1.06, 1.10) | 1.07*** (1.05, 1.09) |
| Black              | 0.60*** (0.44, 0.83) | 0.58*** (0.41, 0.82) | 0.58*** (0.41, 0.82) | 0.43*** (0.30, 0.62) | 0.55*** (0.39, 0.77) |
| Hispanic           | 0.81 (0.58, 1.12)    | 1.05 (0.73, 1.50)    | 1.06 (0.73, 1.51)    | 0.90 (0.62, 1.30)    | 1.03 (0.72, 1.48)    |
| Asian              | 0.26*** (0.12, 0.56) | 0.32*** (0.14, 0.73) | 0.30*** (0.13, 0.69) | 0.27*** (0.12, 0.62) | 0.31*** (0.14, 0.71) |
| Am. Indian         | 0.62* (0.36, 1.07)   | 0.89 (0.50, 1.57)    | 0.89 (0.50, 1.59)    | 0.68 (0.38, 1.22)    | 0.88 (0.50, 1.55)    |
| Female             | 0.75** (0.58, 0.96)  | 1.35 (0.93, 1.96)    | 1.31 (0.90, 1.92)    | 1.42* (0.97, 2.08)   | 1.40* (0.96, 2.05)   |
| Height (1 cm)      |                      | 1.03*** (1.01, 1.05) | 1.03*** (1.01, 1.05) | 1.03*** (1.01, 1.06) | 1.04*** (1.01, 1.06) |
| Ever Smoker        |                      | 1.24* (0.96, 1.59)   | 1.21 (0.94, 1.56)    | 1.23 (0.95, 1.59)    | 1.22 (0.95, 1.57)    |
| ln(Triglyceride)   |                      | 1.35** (1.02, 1.79)  | 1.33** (1.00, 1.77)  | 1.20 (0.90, 1.60)    | 1.27 (0.95, 1.69)    |
| eGFR (10ml/min)    |                      | 0.96 (0.90, 1.04)    | 0.96 (0.89, 1.04)    | 0.97 (0.90, 1.04)    | 0.97 (0.90, 1.04)    |
| Weight (5 kg)      |                      | 1.06*** (1.02, 1.09) | 1.05*** (1.02, 1.09) | 1.04** (1.01, 1.08)  | 1.05*** (1.01, 1.09) |
| Low B12 or Supp.   |                      |                      | 1.68** (1.11, 2.54)  |                      |                      |
| HbA1c mean         |                      |                      |                      | 1.82*** (1.53, 2.17) |                      |
| ln(Diabetes Years) |                      |                      |                      |                      | 1.05*** (1.02, 1.08) |
| N                  | 1,792                | 1,709                | 1,684                | 1,709                | 1,709                |

Notes:

If a covariate does not have a corresponding OR value in a column, the covariate was excluded from the model.

\*\*\*Significant at the 1 percent level.

\*\*Significant at the 5 percent level.

\*Significant at the 10 percent level.

For Black, Hispanic, Asian, and Am. Indian indicators, White is the reference group

Supplemental Table 3. Estimated odds ratios (95% confidence intervals) from logistic regression models with presence of DSPN as the response for model including Age x Treatment Group interaction.

|                 | OR (95% Confidence Interval) |
|-----------------|------------------------------|
| Lifestyle       | 1.02 (1.76, 1.37)            |
| Metformin       | 0.93 (0.69, 1.25)            |
| Age (Years)     | 1.07*** (1.04, 1.09)         |
| Black           | 0.60*** (0.44, 0.83)         |
| Hispanic        | 0.80 (0.58, 1.11)            |
| Asian           | 0.26*** (0.12, 0.56)         |
| Am. Indian      | 0.63* (0.37, 1.09)           |
| Female          | 0.75** (0.58, 0.96)          |
| Lifestyle x Age | 0.96** (0.93, 0.99)          |
| Metformin x Age | 0.99 (0.96, 1.02)            |
| <i>N</i>        | 1,792                        |

Notes:

\*\*\* Significant at the 1 percent level.

\*\* Significant at the 5 percent level.

\* Significant at the 10 percent level.

The age variable was centered at the sample mean age of 70.36 years. The estimated OR for the Lifestyle variable is interpreted as the OR for DSPN comparing Lifestyle to Placebo for those who are 70.36 years of age. Similarly, the estimated OR for the Metformin variable is interpreted as the OR for DSPN comparing Metformin to Placebo for those who are 70.36 years of age.

Supplemental Figure 1. Consort Diagram

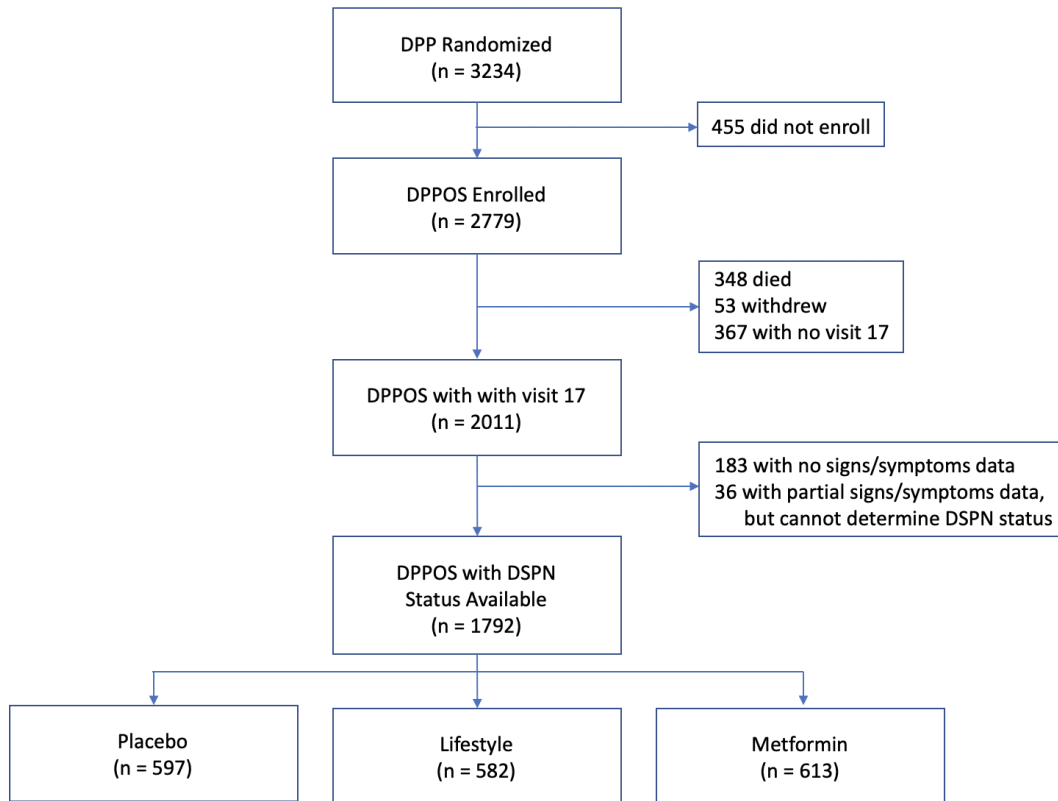

## Appendix

### DPP, DPPOS 1, DPPOS 2 & DPPOS 3 Research Group (1996-2021)

#### **Pennington Biomedical Research Center (Baton Rouge, LA)**

George A. Bray, MD\*  
Kishore M. Gadde, MD\*  
Iris W. Culbert, BSN, RN, CCRC\*\*  
Jennifer Arceneaux RN, BSN\*\*  
Annie Chatellier, RN, CCRC\*\*  
Amber Dragg RD, LDN\*\*  
Catherine M. Champagne, PhD, RD  
Crystal Duncan, LPN  
Barbara Eberhardt, RD, LDN  
Frank Greenway, MD  
Fonda G. Guillory, LPN  
April A. Herbert, RD  
Michael L. Jeffirs, LPN  
Betty M. Kennedy, MPA  
Erma Levy, RD  
Monica Lockett, LPN  
Jennifer C. Lovejoy, PhD  
Laura H. Morris, BS  
Lee E. Melancon, BA, BS  
Donna H. Ryan, MD  
Deborah A. Sanford, LPN  
Kenneth G. Smith, BS, MT  
Lisa L. Smith, BS  
Julia A. St.Amant, RTR  
Richard T. Tulley, PhD  
Paula C. Vicknair, MS, RD  
Donald Williamson, PhD  
Jeffery J. Zachwieja, PhD

#### **University of Chicago (Chicago, IL)**

Kenneth S. Polonsky, MD\*  
Janet Tobian, MD, PhD\*  
David A. Ehrmann, MD\*  
Margaret J. Matulik, RN, BSN\*\*  
Karla A. Temple, PhD, RDN, LDN\*\*  
Bart Clark, MD  
Kirsten Czech, MS  
Catherine DeSandre, BA  
Brittnie Dotson, MS  
Ruthanne Hilbrich, RD  
Wylie McNabb, EdD  
Ann R. Semenske, MS, RD

#### **Jefferson Medical College (Philadelphia, PA)**

Jose F. Caro, MD\*  
Kevin Furlong, DO\*  
Barry J. Goldstein, MD, PhD\*  
Pamela G. Watson, RN, ScD\*

Kellie A. Smith, RN, MSN\*\*  
Jewel Mendoza, RN, BSN\*\*  
Marsha Simmons, CCRP\*\*  
Wendi Wildman, RN\*\*  
Renee Liberoni, MPH  
John Spandorfer, MD  
Constance Pepe, MS, RD

#### **University of Miami (Miami, FL)**

Richard P. Donahue, PhD\*  
Ronald B. Goldberg, MD\*  
Ronald Prineas, MD, PhD\*  
Jeanette Calles, MEd\*\*  
Anna Giannella, RD, MS\*\*  
Patricia Rowe, MPA\*\*  
Juliet Sanguily, RN\*\*  
Paul Cassanova-Romero, MD  
Sumaya Castillo-Florez, MPH  
Hermes J. Florez, MD  
Rajesh Garg, MD  
Lascelles Kirby, MS  
Olga Lara  
Carmen Larreal  
Valerie McLymont, RN  
Jadell Mendez  
Arlette Perry, PhD  
Patrice Saab, PhD  
Bertha Veciana

#### **The University of Texas Health Science Center (San Antonio, TX)**

Steven M. Haffner, MD, MPH\*  
Helen P. Hazuda, PhD\*  
Maria G. Montez, RN, MSHP, CDE\*\*  
Kathy Hattaway, RD, MS  
Juan Isaac, RN, BSN  
Carlos Lorenzo, MD, PhD  
Arlene Martinez, RN, BSN, CDE  
Monica Salazar

Tatiana Walker, RD, MS, CDE

#### **University of Colorado (Denver, CO)**

Dana Dabelea, MD, PhD\*  
Richard F. Hamman, MD, DrPH\*  
Patricia V. Nash, MS\*\*  
Sheila C. Steinke, MS\*\*  
Lisa Testaverde, MS\*\*  
Jennifer Truong, MPH\*\*  
Denise R. Anderson, RN, BSN  
Larry B. Ballonoff, MD  
Alexis Bouffard, MA, RN, BSN

\* denotes Principal Investigator

\*\* denotes Program Coordinator

## Appendix

### DPP, DPPOS 1, DPPOS 2 & DPPOS 3 Research Group (1996-2021)

Brian Bucca OD, FAOO  
B. Ned Calonge, MD, MPH  
Lynne Delve  
Martha Farago, RN  
James O. Hill, PhD  
Shelley R. Hoyer, BS  
Tonya Jenkins, RD, CDE  
Bonnie T. Jortberg, MS, RD, CDE  
Dione Lenz, RN, BSN, CDE  
Marsha Miller, MS, RD  
Thomas Nilan, BS  
Leigh Perreault, MD  
David W. Price, MD  
Judith G. Regensteiner, PhD  
Emily B. Schroeder, MD  
Helen Seagle, MS, RD  
Carissa M. Smith, BS  
Brent VanDorsten, PhD  
**Ioslin Diabetes Center (Boston, MA)**  
Edward S. Horton, MD\*  
Medha Munshi, MD\*  
Kathleen E. Lawton, RN\*\*  
Sharon D. Jackson, CCRC, MS, RD, CDE\*\*  
Catherine S. Poirier, RN, BSN\*\*  
Kati Swift, RN, BSN\*\*  
Ronald A. Arky, MD  
Marybeth Bryant  
Jacqueline P. Burke, BSN  
Enrique Caballero, MD  
Karen M. Callaphan, BA  
Barbara Fargnoli, RD  
Therese Franklin  
Om P. Ganda, MD  
Ashley Guidi, BS  
Mathew Guido, BA  
Alan M. Jacobsen, MD  
Lyn M. Kula, RD  
Margaret Kocal, RN, CDE  
Lori Lambert, MS, RD, LD  
Kathleen E. Lawton, RN  
Sarah Ledbury, Med, RD  
Maureen A. Malloy, BS  
Roeland J.W. Middelbeek, MD  
Maryanne Nicosia, MS, RD  
Cathryn F. Oldmixon, RN  
Jocelyn Pan, BS, MPH  
Marizel Quitingon  
Riley Rainville, BS

Stacy Rubtchinsky, BS  
Ellen W. Seely, MD  
Jessica Sansoucy, BS  
Dana Schweizer, BSN  
Donald Simonson, MD  
Fannie Smith, MD  
Caren G. Solomon, MD, MPH  
Jeanne Spellman, RD  
James Warram, MD  
**VA Puget Sound Health Care System and  
University of Washington (Seattle, WA)**  
Steven E. Kahn, MB, ChB\*  
Basma Fattaleh, BA \*\*  
Brenda K. Montgomery, RN, BSN, CDE\*\*  
Celeste Colegrove, BS  
Wilfred Fujimoto, MD  
Robert H. Knopp, MD  
Edward W. Lipkin, MD  
Michelle Marr, BA  
Ivy Morgan-Taggart  
Anne Murillo, BS  
Kayla O'Neal, BS  
Dace Trence, MD  
Lonnese Taylor, RN, BS  
April Thomas, RD, MPH, CDE  
Elaine C. Tsai, MD, MPH  
**University of Tennessee (Memphis, TN)**  
Samuel Dagogo-Jack, MD, MSc, FRCP, FACP\*  
Abbas E. Kitabchi, PhD, MD, FACP\*  
Mary E. Murphy, RN, MS, CDE, MBA\*\*  
Laura Taylor, RN, BSN, CDE\*\*  
Jennifer Dolgoff, RN, BSN\*\*  
William B. Applegate, MD, MPH  
Michael Bryer-Ash, MD  
Debra Clark, LPN  
Sandra L. Frieson, RN  
Uzoma Ibebuogu, MD  
Raed Imseis, MD  
Helen Lambeth, RN, BSN  
Lynne C. Lichtermann, RN, BSN  
Hooman Oktai, MD  
Harriet Ricks  
Lily M.K. Rutledge, RN, BSN  
Amy R. Sherman, RD, LD  
Clara M. Smith, RD, MHP, LDN  
Judith E. Soberman, MD  
Beverly Williams-Cleaves, MD  
Avnisha Patel, MLT

\* denotes Principal Investigator

\*\* denotes Program Coordinator

## Appendix

### DPP, DPPOS 1, DPPOS 2 & DPPOS 3 Research Group (1996-2021)

Ebenezer A. Nyenwe, MD, FACP

Ethel Faye Hampton, R.N.

#### **Northwestern University's Feinberg School of Medicine (Chicago, IL)**

Boyd E. Metzger, MD\*

Mark E. Molitch, MD\*

Mariana K. Johnson, MS, RN\*\*

Daphne T. Adelman, MBA, RN

Catherine Behrends

Michelle Cook, MS

Marian Fitzgibbon, PhD

Mimi M. Giles, MS, RD

Deloris Heard, MA

Cheryl K.H. Johnson, MS, RN

Diane Larsen, BS

Anne Lowe, BS

Megan Lyman, BS

David McPherson, MD

Samsam C. Penn, BA

Thomas Pitts, MD

Renee Reinhart, RN, MS

Susan Roston, RN, RD

Pamela A. Schinleber, RN, MS

Amisha Wallia, MD

#### **Massachusetts General Hospital (Boston, MA)**

David M. Nathan, MD\*

Charles McKittrick, BSN\*\*

Heather Turgeon, BSN\*\*

Mary Larkin, MSN\*\*

Marielle Mugford, BA\*\*

Kathy Abbott

Ellen Anderson, MS, RD

Laurie Bissett, MS, RD

Kristy Bondi, BS

Enrico Cagliero, MD

Jose C. Florez, MD, PhD+

Linda Delahanty, MS, RD

Valerie Goldman, MS, RD

Elaine Grassa

Lindsery Gurry BSN, RN, CDE

Kali D'Anna

Fernelle Leandre BS

Peter Lou, MD

Alexandra Poulos

Elyse Raymond, BS

Valerie Ripley, BS

Christine Stevens, RN

Beverly Tseng

#### **University of California-San Diego (La Jolla, CA)**

Jerrold M. Olefsky, MD\*

Elizabeth Barrett-Connor, MD\*

Sunder Mudaliar, MD\*

Maria Rosario Araneta, PhD\*

Mary Lou Carrion-Petersen, RN, BSN\*\*

Karen Vejvoda, RN, BSN, CDE, CCRC\*\*

Sarah Bassiouni, MPH

Madeline Beltran, RN, BSN, CDE

Lauren N. Claravall, BS

Jonalle M. Dowden, BS

Steven V. Edelman, MD

Pranav Garimella, MBBS

Robert R. Henry, MD

Javiva Horne, RD

Marycie Lamkin, RN

Simona Szerdi Janesch, BA

Diana Leos

William Polonsky, PhD

Rosa Ruiz

Jean Smith, RN

Jennifer Torio-Hurley

#### **Columbia University (New York, NY)**

F. Xavier Pi-Sunyer, MD\*

Jane E. Lee, MS\*\*

Susan Hagamen, MS, RN, CDE\*\*

David B. Allison, PhD

Nnenna Agharanya

Nancy J. Aronoff, MS, RD

Maria Baldo

Jill P. Crandall, MD

Sandra T. Foo, MD

Jose A. Luchsinger, MD, MPH

Carmen Pal, MD

Kathy Parkes, RN

Mary Beth Pena, RN

Ellen S. Rooney, BA

Gretchen E.H. Van Wye, MA

Kristine A. Viscovich, ANP

#### **Indiana University (Indianapolis, IN)**

Mary de Groot, PhD\*

David G. Marrero, PhD\*

Kieren J. Mather, MD\*

Melvin J. Prince, MD\*

Susie M. Kelly, RN, CDE\*\*

Marcia A. Jackson\*\*

Gina McAtee\*\*

Paula Putteny, RN\*\*

\* denotes Principal Investigator

\*\* denotes Program Coordinator

## Appendix

### DPP, DPPOS 1, DPPOS 2 & DPPOS 3 Research Group (1996-2021)

Ronald T. Ackermann, MD  
Carolyn M. Cantrell  
Yolanda F. Dotson, BS  
Edwin S. Fineberg, MD  
Megan Fultz  
John C. Guare, PhD  
Angela Hadden  
James M. Ignaut, MA  
Marion S. Kirkman, MD  
Erin O'Kelly Phillips  
Kisha L Pinner  
Beverly D. Porter, MSN  
Paris J. Roach, MD  
Nancy D. Rowland, BS, MS  
Madelyn L. Wheeler, RD  
**Medstar Research Institute (Washington, DC)**  
Vanita Aroda, MD\*  
Michelle Magee, MD\*  
Robert E. Ratner, MD\*  
Gretchen Youssef, RD, CDE\*\*  
Sue Shapiro, RN, BSN, CCRC\*\*  
Natalie Andon, RN  
Catherine Bavido-Arrage, MS, RD, LD  
Geraldine Boggs, MSN, RN  
Marjorie Bronsord, MS, RD, CDE  
Ernestine Brown  
Holly Love Burkott, RN  
Wayman W. Cheatham, MD  
Susan Cola  
Cindy Evans  
Peggy Gibbs  
Tracy Kellum, MS, RD, CDE  
Lilia Leon  
Milvia Lagarda  
Claresa Levatan, MD  
Milajurine Lindsay  
Asha K. Nair, BS  
Jean Park, MD  
Maureen Passaro, MD  
Angela Silverman  
Gabriel Uwaifo, MD  
Debra Wells-Thayer, NP, CDE  
Renee Wiggins, RD  
**University of Southern California/UCLA  
Research Center (Alhambra, CA)**  
Mohammed F. Saad, MD\*  
Karol Watson, MD\*  
Maria Budget\*\*

Sujata Jinagouda, MD\*\*  
Medhat Botrous, MD\*\*  
Anthony Sosa\*\*  
Sameh Tadros\*\*  
Khan Akbar, MD  
Claudia Conzues  
Perpetua Magpuri  
Kathy Ngo  
Amer Rassam, MD  
Debra Waters  
Kathy Xapthalamous  
**Washington University (St. Louis, MO)**  
Julio V. Santiago, MD\*  
Samuel Dagogo-Jack, MD, MSc, FRCP, FACP\*  
Neil H. White, MD, CDE\*  
Angela L. Brown, MD\*  
Samia Das, MS, MBA, RD, LD\*\*  
Prajakta Khare-Ranade, MSc, RDN, LD\*\*  
Tamara Stich, RN, MSN, CDE\*\*  
Ana Santiago, RN  
Edwin Fisher, PhD  
Emma Hurt, RN  
Tracy Jones, RN  
Michelle Kerr, RD  
Lucy Ryder, RN  
Cormarie Wernimont, RD, LD  
**Johns Hopkins School of Medicine  
(Baltimore, MD)**  
Sherita Hill Golden, MD, MHS, FAHA\*  
Christopher D. Saudek, MD\*  
Vanessa Bradley, BA\*\*  
Emily Sullivan, MEd, RN\*\*  
Tracy Whittington, BS\*\*  
Caroline Abbas  
Adrienne Allen  
Frederick L. Brancati, MD, MHS  
Sharon Cappelli  
Jeanne M. Clark, MD  
Jeanne B. Charleston, RN, MSN  
Janice Freel  
Katherine Horak, RD  
Alicia Greene  
Dawn Jiggetts  
Deloris Johnson  
Hope Joseph  
Kimberly Loman  
Nestoras Mathioudakis, MD, MHS  
Henry Mosley

\* denotes Principal Investigator

\*\* denotes Program Coordinator



## Appendix

### DPP, DPPOS 1, DPPOS 2 & DPPOS 3 Research Group (1996-2021)

John Reusing  
Richard R. Rubin, PhD  
Alafia Samuels, MD  
Thomas Shields  
Shawne Stephens  
Kerry J. Stewart, EdD  
LeeLana Thomas  
Evonne Utsey  
Paula Williamson

#### **University of New Mexico (Albuquerque, NM)**

David S. Schade, MD\*  
Karwyn S. Adams, RN, MSN\*\*  
Janene L. Canady, RN, CDE\*\*  
Carolyn Johannes, RN, CDE\*\*  
Claire Hemphill, RN, BSN\*\*  
Penny Hyde, RN, BSN\*\*  
Leslie F. Adler, PhD  
Patrick J. Boyle, MD  
Mark R. Burge, MD  
Lisa Chai, RN  
Kathleen Colleran, MD  
Ateka Fondino  
Ysela Gonzales  
Doris A. Hernandez-McGinnis  
Patricia Katz, LPN  
Carolyn King, MD  
Julia Middendorf, RN  
Amer Rassam, MD  
Sofya Rubinchik, MD  
Willette Senter, RD  
Debra Waters, PhD

#### **Albert Einstein College of Medicine (Bronx, NY)**

Jill Crandall, MD\*  
Harry Shamoon, MD\*  
Janet O. Brown, RN, MPH, MSN\*\*  
Gilda Trandafirescu, MD\*\*  
Danielle Powell, MPH  
Elsie Adorno, BS  
Liane Cox, MS, RD  
Helena Duffy, MS, C-ANP  
Samuel Engel, MD  
Allison Friedler, BS  
Angela Goldstein, FNP-C, NPP, CSW  
Crystal J. Howard-Century, MA  
Jennifer Lukin, BA  
Stacey Kloiber, RN  
Nadege Longchamp, LPN  
Helen Martinez, RN, MSN, FNP-C

Dorothy Pompei, BA  
Jonathan Scheindlin, MD  
Elissa Violino, RD, MS  
Elizabeth A. Walker PhD, RN  
Judith Wylie-Rosett, EdD, RD  
Elise Zimmerman, RD, MS  
Joel Zonszein, MD

#### **University of Pittsburgh (Pittsburgh, PA)**

Trevor Orchard, MD\*  
Elizabeth Venditti, PhD\*  
Rena R. Wing, PhD\*  
Susan Jeffries, RN, MSN\*\*  
Gaye Koenning, MS, RD\*\*  
M. Kaye Kramer, BSN, MPH\*\*  
Marie Smith, RN, BSN\*\*  
Susan Barr, BS  
Catherine Benchoff  
Miriam Boraz, PhD  
Lisa Clifford, BS  
Rebecca Culyba, BS  
Marlene Frazier  
Ryan Gilligan, BS  
Stephanie Guimond, BS  
Susan Harrier, MLT  
Louann Harris, RN  
Andrea Kriska, PhD  
Qurashia Manjoo, MD  
Monica Mullen, MHP, RD  
Alicia Noel, BS  
Amy Otto, PhD  
Jessica Pettigrew, CMA  
Bonny Rockette-Wagner, PhD  
Debra Rubinstein, MD  
Linda Semler, MS, RD  
Cheryl F. Smith, PhD  
Valarie Weinzierl, MPH  
Katherine V. Williams, MD, MPH  
Tara Wilson, BA

#### **University of Hawaii (Honolulu, HI)**

Marjorie K. Mau, MD\*  
Narleen K. Baker-Ladao, BS\*\*  
John S. Melish, MD  
Richard F. Arakaki, MD\*  
Renee W. Latimer, BSN, MPH\*\*  
Mae K. Isonaga, RD, MPH\*\*  
Ralph Beddow, MD  
Nina E. Bermudez, MS  
Lorna Dias, AA

\* denotes Principal Investigator

\*\* denotes Program Coordinator

## Appendix

### DPP, DPPOS 1, DPPOS 2 & DPPOS 3 Research Group (1996-2021)

Jillian Inouye, RN, PhD  
Kathy Mikami, BS, RD  
Pharis Mohideen, MD  
Sharon K. Odom, RD, MPH  
Raynette U. Perry, AA  
Robin E. Yamamoto, CDE, RD  
**Southwest American Indian Centers**  
**(Phoenix, AZ; Shiprock, NM; Zuni, NM)**  
William C. Knowler, MD, DrPH\*+  
Harelda Anderson, LMSW\*\*  
Norman Cooney\*\*  
Charlotte Dodge\*\*  
Mary A. Hoskin, RD, MS\*\*  
Carol A. Percy, RN, MS\*\*  
Alvera Enoté\*\*  
Camille Natewa\*\*  
Kelly J. Acton, MD, MPH  
Vickie L. Andre, RN, FNP  
Rosalyn Barber  
Shandiin Begay, MPH  
Peter H. Bennett, MB, FRCP  
Mary Beth Benson, RN, BSN  
Evelyn C. Bird, RD, MPH  
Brenda A. Broussard, RD, MPH, MBA, CDE  
Brian C. Bucca, OD, FAAO  
Marcella Chavez, RN, AS  
Sherron Cook  
Jeff Curtis, MD  
Tara Dacawyma  
Matthew S. Doughty, MD  
Roberta Duncan, RD  
Cyndy Edgerton, RD  
Jacqueline M. Ghahate  
Justin Glass, MD  
Martia Glass, MD  
Dorothy Gohdes, MD  
Wendy Grant, MD  
Robert L. Hanson, MD, MPH  
Ellie Horse  
Louise E. Ingraham, MS, RD, LN  
Merry Jackson  
Priscilla Jay  
Roylen S. Kaskalla  
Karen Kavena, ANP  
David Kessler, MD  
Kathleen M. Kobus, RNC-ANP  
Jonathan Krakoff, MD  
Jason Kurland, MD

Catherine Manus, LPN  
Cherie McCabe  
Sara Michaels, MD  
Tina Morgan  
Yolanda Nashboo  
Julie A. Nelson, RD  
Steven Poirier, MD  
Evette Polczynski, MD  
Christopher Piromalli, DO  
Mike Reidy, MD  
Jeanine Roumain, MD, MPH  
Debra Rowse, MD  
Robert J. Roy  
Sandra Sangster, RD  
Janet Sewenemewa  
Miranda Smart  
Chelsea Spencer  
Darryl Tonemah, PhD  
Rachel Williams, FNP  
Charlton Wilson, MD  
Michelle Yazzie  
**George Washington University Biostatistics**  
**Center (DPP Coordinating Center Rockville,**  
**MD)**  
Raymond Bain, PhD\*  
Sarah Fowler, PhD\*  
Marinella Temprosa, PhD\*  
Kathleen Jablonski, PhD\*  
Michael D. Larsen, PhD\*  
Tina Brenneman\*\*  
Sharon L. Edelstein, ScM\*\*  
Solome Abebe, MS  
Julie Bamdad, MS  
Melanie Barkalow  
Joel Bethupu  
Tsedenia Bezabeh  
Anna Bowers  
Nicole Butler  
Jackie Callaghan  
Caitlin E. Carter  
Costas Christophi, PhD  
Gregory M. Dwyer, MPH  
Mary Foulkes, PhD  
Yuping Gao  
Robert Gooding  
Adrienne Gottlieb  
Kristina L. Grimes  
Nisha Grover-Fairchild, MPH

\* denotes Principal Investigator

\*\* denotes Program Coordinator

## Appendix

### DPP, DPPOS 1, DPPOS 2 & DPPOS 3 Research Group (1996-2021)

Lori Haffner, MS  
Heather Hoffman, PhD

Steve Jones  
Tara L. Jones  
Richard Katz, MD  
Preethy Kolinjivadi, MS  
John M. Lachin, ScD  
Yong Ma, PhD  
Pamela Mucik

Robert Orlosky  
Qing Pan, PhD  
Susan Reamer

James Rochon, PhD  
Alla Sapozhnikova  
Hanna Sherif, MS  
Charlotte Stimpson  
Ashley Hogan Tjaden, MPH  
Fredricka Walker-Murray

#### **Lifestyle Resource Core**

Elizabeth M. Venditti, PhD\*  
Andrea M. Kriska, PhD  
Linda Semler, MS, RD, LDN  
Valerie Weinzierl, MPH

#### **Central Biochemistry Laboratory (Seattle, WA)**

Santica Marcovina, PhD, ScD\*  
F. Alan Aldrich\*\*  
Jessica Harting\*\*  
John Albers, PhD

Greg Strylewicz, PhD

#### **NIH/NIDDK (Bethesda, MD)**

R. Eastman, MD  
Judith Fradkin, MD  
Sanford Garfield, PhD  
Christine Lee, MD, MS

#### **Centers for Disease Control & Prevention (Atlanta, GA)**

Edward Gregg, PhD  
Ping Zhang, PhD

#### **Carotid Ultrasound**

Dan O'Leary, MD\*  
Gregory Evans

#### **Coronary Artery Calcification Reading Center**

Matthew Budoff, MD  
Chris Dailing

#### **CT Scan Reading Center**

Elizabeth Stamm, MD\*

#### **Dual Energy X-ray Absorptiometry Reading Center (San Francisco, CA)**

Ann Schwartz, PhD

Caroline Navy

Lisa Palermo, MS

#### **Epidemiological Cardiology Research Center- Epicare (Winston-Salem, NC)**

Pentti Rautaharju, MD, PhD\*

Ronald J. Prineas, MD, PhD\*\*

Teresa Alexander

Charles Campbell, MS

Sharon Hall

Yabing Li, MD

Margaret Mills

Nancy Pemberton, MS

Farida Rautaharju, PhD

Zhuming Zhang, MD

Elsayed Z. Soliman, MD\*

Julie Hu, MSc

Susan Hensley, BS

Lisa Keasler

Tonya Taylor

#### **Fundus Photo Reading Center (Madison, WI)**

Barbara Blodi, MD\*

Ronald Danis, MD\*

Matthew Davis, MD\*

Larry Hubbard\*

Ryan Endres\*\*

Deborah Elsas\*\*

Samantha Johnson\*\*

Dawn Myers\*\*

Nancy Barrett

Heather Baumhauer

Wendy Benz

Holly Cohn

Ellie Corkery

Kristi Dohm

Amitha Domalpally, MD, PhD

Vonnie Gama

Anne Goulding

Andy Ewen

Cynthia Hurtenbach

Daniel Lawrence

Kyle McDaniel

Jeong Pak

James Reimers

Ruth Shaw

Maria Swift

Pamela Vargo, CRA

Sheila Watson

\* denotes Principal Investigator

\*\* denotes Program Coordinator

## Appendix

### DPP, DPPOS 1, DPPOS 2 & DPPOS 3 Research Group (1996-2021)

#### **Neurocognitive Assessment Group**

Jose A. Luchsinger, MD, MPH

Jennifer Manly, PhD

#### **Nutrition Coding Center (Columbia, SC)**

Elizabeth Mayer-Davis, PhD\*

Robert R. Moran, PhD\*\*

#### **Quality of Well-Being Center (La Jolla, CA)**

Ted Ganiats, MD\*

Kristin David, MHP\*

Andrew J. Sarkin, PhD\*

Erik Groessl, PhD

Naomi Katzir

Helen Chong, MA

#### **University of Michigan (Ann Arbor, MI)**

William H. Herman, MD, MPH

Michael Brändle, MD, MS

Morton B. Brown, PhD

Shihchen Kuo, R.Ph., Ph.D.

Wen Ye, Ph.D.

#### **+Genetics Working Group**

Jose C. Florez, MD, PhD<sup>1, 2</sup>

David Altshuler, MD, PhD<sup>1, 2</sup>

Liana K. Billings, MD<sup>1</sup>

Ling Chen, MS<sup>1</sup>

Maegan Harden, BS<sup>2</sup>

Robert L. Hanson, MD, MPH<sup>3</sup>

William C. Knowler, MD, DrPH<sup>3</sup>

Toni I. Pollin, PhD<sup>4</sup>

Alan R. Shuldiner, MD<sup>4</sup>

Kathleen Jablonski, PhD<sup>5</sup>

Paul W. Franks, PhD, MPhil, MS<sup>6, 7, 8</sup>

Marie-France Hivert, MD<sup>1</sup>

1=Massachusetts General Hospital

2=Broad Institute

3=NIDDK

4=University of Maryland

5=Coordinating Center

6=Lund University, Sweden

7=Umeå University, Sweden

8=Harvard School of Public Health

\* denotes Principal Investigator

\*\* denotes Program Coordinator
