# Supplementary material
Source: publisher figshare collection journal article supplement (https://diabetesjournals.figshare.com/articles/dataset/_/25130252)
Supplement: Supplementary file 2 [file 1]

**DPP, DPPOS 1, DPPOS 2 & DPPOS 3A Research Group**  
(1996-2021)

**Pennington Biomedical Research Center**  
**(Baton Rouge, LA)**

George A. Bray, MD\*  
Kishore M. Gadde, MD\*  
Iris W. Culbert, BSN, RN, CCRC\*\*  
Jennifer Arceneaux RN, BSN\*\*  
Annie Chatellier, RN, CCRC\*\*  
Amber Dragg RD, LDN\*\*  
Catherine M. Champagne, PhD, RD  
Crystal Duncan, LPN  
Barbara Eberhardt, RD, LDN  
Frank Greenway, MD  
Fonda G. Guillory, LPN  
April A. Herbert, RD  
Michael L. Jeffirs, LPN  
Betty M. Kennedy, MPA  
Erma Levy, RD  
Monica Lockett, LPN  
Jennifer C. Lovejoy, PhD  
Laura H. Morris, BS  
Lee E. Melancon, BA, BS  
Donna H. Ryan, MD  
Deborah A. Sanford, LPN  
Kenneth G. Smith, BS, MT  
Lisa L. Smith, BS  
Julia A. StAmant, RTR  
Richard T. Tulley, PhD  
Paula C. Vicknair, MS, RD  
Donald Williamson, PhD  
Jeffery J. Zachwieja, PhD

**University of Chicago (Chicago, IL)**

Kenneth S. Polonsky, MD\*  
Janet Tobian, MD, PhD\*  
David A. Ehrmann, MD\*  
Margaret J. Matulik, RN, BSN\*\*  
Karla A. Temple, PhD, RDN, LDN\*\*  
Bart Clark, MD  
Kirsten Czech, MS  
Catherine DeSandre, BA  
Brittnie Dotson, MS  
Ruthanne Hilbrich, RD  
Wylie McNabb, EdD  
Ann R. Semenske, MS, RD  
Celeste C. Thomas, MD

**Jefferson Medical College (Philadelphia, PA)**

Jose F. Caro, MD\*  
Kevin Furlong, DO\*  
Barry J. Goldstein, MD, PhD\*  
Pamela G. Watson, RN, ScD\*  
Kellie A. Smith, RN, MSN\*\*  
Jewel Mendoza, RN, BSN\*\*

Marsha Simmons, CCRP\*\*  
Wendi Wildman, RN\*\*  
Renee Liberoni, MPH  
John Spandorfer, MD  
Constance Pepe, MS, RD  
**University of Miami (Miami, FL)**  
Richard P. Donahue, PhD\*  
Ronald B. Goldberg, MD\*  
Ronald Prineas, MD, PhD\*  
Jeanette Calles, MSEd\*\*  
Anna Giannella, RD, MS\*\*  
Patricia Rowe, MPA\*\*  
Juliet Sanguily, RN\*\*  
Paul Cassanova-Romero, MD  
Sumaya Castillo-Florez, MPH  
Hermes J. Florez, MD  
Rajesh Garg, MD  
Lascelles Kirby, MS  
Olga Lara  
Carmen Larreal  
Valerie McLymont, RN  
Jadell Mendez  
Arlette Perry, PhD  
Patrice Saab, PhD  
Bertha Veciana

**The University of Texas Health Science Center**  
**(San Antonio, TX)**

Steven M. Haffner, MD, MPH\*  
Helen P. Hazuda, PhD\*  
Maria G. Montez, RN, MSHP, CDE\*\*  
Kathy Hattaway, RD, MS  
Juan Isaac, RN, BSN\*\*  
Carlos Lorenzo, MD, PhD  
Arlene Martinez, RN, BSN, CDE  
Monica Salazar  
Tatiana Walker, RD, MS, CDE

**University of Colorado (Denver, CO)**

Dana Dabelea, MD, PhD\*  
Richard F. Hamman, MD, DrPH\*  
Patricia V. Nash, MS\*\*  
Sheila C. Steinke, MS\*\*  
Lisa Testaverde, MS\*\*  
Jennifer Truong, MPH\*\*  
Denise R. Anderson, RN, BSN  
Larry B. Ballonoff, MD  
Alexis Bouffard, MA, RN, BSN  
Brian Bucca OD, FAOD  
B. Ned Calonge, MD, MPH  
Lynne Delve  
Martha Farago, RN  
James O. Hill, PhD

\* denotes Principal Investigator

\*\* denotes Program Coordinator

**DPP, DPPOS 1, DPPOS 2 & DPPOS 3A Research Group**  
(1996-2021)

Shelley R. Hoyer, BS  
Tonya Jenkins, RD, CDE  
Bonnie T. Jortberg, MS, RD, CDE  
Dione Lenz, RN, BSN, CDE  
Marsha Miller, MS, RD  
Thomas Nilan, BS  
Leigh Perreault, MD  
David W. Price, MD  
Judith G. Regensteiner, PhD  
Emily B. Schroeder, MD  
Helen Seagle, MS, RD  
Carissa M. Smith, BS  
Brent VanDorsten, PhD  
**Ioslin Diabetes Center (Boston, MA)**  
Edward S. Horton, MD\*  
Medha Munshi, MD\*  
Kathleen E. Lawton, RN\*\*  
Sharon D. Jackson, CCRC, MS, RD, CDE\*\*  
Catherine S. Poirier, RN, BSN\*\*  
Kati Swift, RN, BSN\*\*  
Ronald A. Arky, MD  
Marybeth Bryant  
Jacqueline P. Burke, BSN  
Enrique Caballero, MD  
Karen M. Callaphan, BA  
Barbara Fagnoli, RD  
Therese Franklin  
Om P. Ganda, MD  
Ashley Guidi, BS  
Mathew Guido, BA  
Alan M. Jacobsen, MD  
Lyn M. Kula, RD  
Margaret Kocal, RN, CDE  
Lori Lambert, MS, RD, LD  
Kathleen E. Lawton, RN  
Sarah Ledbury, Med, RD  
Maureen A. Malloy, BS  
Roeland J.W. Middelbeek, MD  
Maryanne Nicosia, MS, RD  
Cathryn F. Oldmixon, RN  
Jocelyn Pan, BS, MPH  
Marizel Quitingon  
Riley Rainville, BS  
Stacy Rubtchinsky, BS  
Ellen W. Seely, MD  
Jessica Sansoucy, BS  
Dana Schweizer, BSN  
Donald Simonson, MD  
Fannie Smith, MD  
Caren G. Solomon, MD, MPH  
Jeanne Spellman, RD

James Warram, MD  
**VA Puget Sound Health Care System and University of Washington (Seattle, WA)**  
Steven E. Kahn, MB, ChB\*  
Brenda K. Montgomery, RN, BSN, CDE\*\*  
Basma Fattaleh, BA \*\*  
Celeste Colegrove, BS  
Wilfred Fujimoto, MD  
Robert H. Knopp, MD  
Edward W. Lipkin, MD  
Michelle Marr, BA  
Ivy Morgan-Taggart  
Anne Murillo, BS  
Kayla O'Neal, BS  
Dace Trence, MD  
Lonnese Taylor, RN, BS  
April Thomas, RD, MPH, CDE  
Elaine C. Tsai, MD, MPH  
**University of Tennessee (Memphis, TN)**  
Samuel Dagogo-Jack, MD, DSc, FRCP, FACP\*  
Abbas E. Kitabchi, PhD, MD, FACP\*  
Mary E. Murphy, RN, MS, CDE, MBA\*\*  
Laura Taylor, RN, BSN, CDE\*\*  
Jennifer Dolgoff, RN, BSN\*\*  
William B. Applegate, MD, MPH  
Michael Bryer-Ash, MD  
Debra Clark, LPN  
Sandra L. Frieson, RN  
Uzoma Ibebuogu, MD  
Raed Imseis, MD  
Helen Lambeth, RN, BSN  
Lynne C. Lichtermann, RN, BSN  
Hooman Oktaei, MD  
Harriet Ricks  
Lily M.K. Rutledge, RN, BSN  
Amy R. Sherman, RD, LD  
Clara M. Smith, RD, MHP, LDN  
Judith E. Soberman, MD  
Beverly Williams-Cleaves, MD  
Avnisha Patel, MLT  
Ebenezer A. Nyenwe, MD, FACP  
Ethel Faye Hampton, R.N.  
**Northwestern University's Feinberg School of Medicine (Chicago, IL)**  
Boyd E. Metzger, MD\*  
Mark E. Molitch, MD\*  
Amisha Wallia, MD\*  
Mariana K. Johnson, MS, RN\*\*  
Daphne T. Adelman, MBA, RN  
Catherine Behrends  
Michelle Cook, MS

\* denotes Principal Investigator

\*\* denotes Program Coordinator

**DPP, DPPOS 1, DPPOS 2 & DPPOS 3A Research Group**  
(1996-2021)

Marian Fitzgibbon, PhD  
Mimi M. Giles, MS, RD  
Deloris Heard, MA  
Cheryl K.H. Johnson, MS, RN  
Diane Larsen, BS  
Anne Lowe, BS  
Megan Lyman, BS  
David McPherson, MD  
Samsam C. Penn, BA  
Thomas Pitts, MD  
Renee Reinhart, RN, MS  
Susan Roston, RN, RD  
Pamela A. Schinleber, RN, MS  
Matthew O'Brien, MD  
Monica Hartmuller, MS, RN

**Massachusetts General Hospital (Boston, MA)**

David M. Nathan, MD\*  
Charles McKittrick, BSN\*\*  
Heather Turgeon, BSN\*\*  
Mary Larkin, MSN, RN, CDCES\*\*  
Marielle Mugford, BA\*\*  
Kathy Abbott  
Ellen Anderson, MS, RD  
Laurie Bissett, MS, RD  
Kristy Bondi, BS  
Enrico Cagliero, MD  
Jose C. Florez, MD, PhD+  
Linda Delahanty, MS, RD  
Valerie Goldman, MS, RD  
Elaine Grassa  
Lindsery Gurry BSN, RN, CDCES  
Kali D'Anna  
Fernelle Leandre BS  
Peter Lou, MD  
Alexandra Poulos  
Elyse Raymond, BS  
Valerie Ripley, BS  
Christine Stevens, RN  
Beverly Tseng  
Kathy Chu, BA  
Nopporn Thangthaeng, PhD, BSN, CDCES\*\*

**University of California-San Diego (La Jolla, CA)**

Jerrold M. Olefsky, MD\*  
Elizabeth Barrett-Connor, MD\*  
Sunder Mudaliar, MD\*  
Maria Rosario Araneta, PhD\*  
Mary Lou Carrion-Petersen, RN, BSN\*\*  
Karen Vejvoda, RN, BSN, CDE, CCRC\*\*  
Sarah Bassiouni, MPH  
Madeline Beltran, RN, BSN, CDE  
Lauren N. Claravall, BS

Jonalle M. Dowden, BS  
Steven V. Edelman, MD  
Pranav Garimella, MBBS  
Robert R. Henry, MD  
Javiva Horne, RD  
Marycie Lamkin, RN  
Simona Szerdi Janesch, BA  
Diana Leos  
William Polonsky, PhD  
Rosa Ruiz  
Jean Smith, RN  
Jennifer Torio-Hurley  
**Columbia University (New York, NY)**  
F. Xavier Pi-Sunyer, MD\*  
Blandine LaFerrere, MD, PhD\*  
Jane E. Lee, MS\*\*  
Susan Hagamen, MS, RN, CDE\*\*  
David B. Allison, PhD  
Nnenna Agharanya  
Nancy J. Aronoff, MS, RD  
Maria Baldo  
Jill P. Crandall, MD  
Sandra T. Foo, MD  
Kim Kelly-Dinham  
Jose A. Luchsinger, MD, MPH  
Carmen Pal, MD  
Kathy Parkes, RN  
Mary Beth Pena, RN  
Ellen S. Rooney, BA  
Gretchen E.H. Van Wye, MA  
Kristine A. Viscovich, ANP  
**Indiana University (Indianapolis, IN)**  
Mary de Groot, PhD\*  
David G. Marrero, PhD\*  
Kieren J. Mather, MD\*  
Melvin J. Prince, MD\*  
Susie M. Kelly, RN, CDE\*\*  
Marcia A. Jackson\*\*  
Gina McAtee\*\*  
Paula Puttenney, RN\*\*  
Ronald T. Ackermann, MD  
Carolyn M. Cantrell  
Yolanda F. Dotson, BS  
Edwin S. Fineberg, MD  
Megan Fultz  
John C. Guare, PhD  
Angela Hadden  
James M. Ignaut, MA  
Marion S. Kirkman, MD  
Erin O'Kelly Phillips  
Kisha L Pinner

\* denotes Principal Investigator

\*\* denotes Program Coordinator

**DPP, DPPOS 1, DPPOS 2 & DPPOS 3A Research Group**  
(1996-2021)

Beverly D. Porter, MSN

Paris J. Roach, MD

Nancy D. Rowland, BS, MS

Madelyn L. Wheeler, RD

**Medstar Research Institute (Washington, DC)**

Vanita Aroda, MD\*

Michelle Magee, MD\*

Robert E. Ratner, MD\*

Michelle Magee, MD\*

Gretchen Youssef, RD, CDE\*\*

Sue Shapiro, RN, BSN, CCRC\*\*

Natalie Andon, RN

Catherine Bavido-Arrage, MS, RD, LD

Geraldine Boggs, MSN, RN

Marjorie Bronsord, MS, RD, CDE

Ernestine Brown

Holly Love Burkott, RN

Wayman W. Cheatham, MD

Susan Cola

Cindy Evans

Peggy Gibbs

Tracy Kellum, MS, RD, CDE

Lilia Leon

Milvia Lagarda

Claresa Levatan, MD

Milajurine Lindsay

Asha K. Nair, BS

Jean Park, MD

Maureen Passaro, MD

Angela Silverman

Gabriel Uwaifo, MD

Debra Wells-Thayer, NP, CDE

Renee Wiggins, RD

**University of Southern California/UCLA**  
**Research Center (Alhambra, CA)**

Mohammed F. Saad, MD\*

Karol Watson, MD\*

Christine Darwin, MD

Preethi Srikanthan, MD

Tamara Horwich, MD

Adrian Casillas, MD

Arleen Brown, MD

Maria Budget\*\*

Sujata Jinagouda, MD\*\*

Medhat Botrous, MD\*\*

Anthony Sosa\*\*

Sameh Tadros\*\*

Khan Akbar, MD

Claudia Conzues

Perpetua Magpuri

Carmen Muro

Noemi Neira

Kathy Ngo

Michelle Chan

Veronica Villarreal

Amer Rassam, MD

Debra Waters

Kathy Xaphthalmous

**Washington University (St. Louis, MO)**

Julio V. Santiago, MD\*

Samuel Dagogo-Jack, MD, MSc, FRCP, FACP\*

Neil H. White, MD, CDE\*

Angela L. Brown, MD\*

Samia Das, MS, MBA, RD, LD\*\*

Prajakta Khare-Ranade, MSc, RDN, LD\*\*

Tamara Stich, RN, MSN, CDE\*\*

Ana Santiago, RN

Edwin Fisher, PhD

Emma Hurt, RN

Tracy Jones, RN

Michelle Kerr, RD

Lucy Ryder, RN

Cormarie Wernimont, RD, LD

**Johns Hopkins School of Medicine**  
**(Baltimore, MD)**

Sherita Hill Golden, MD, MHS, FAHA\*

Christopher D. Saudek, MD\*

Vanessa Bradley, BA\*\*

Emily Sullivan, MEd, RN\*\*

Tracy Whittington, BS\*\*

Caroline Abbas

Adrienne Allen

Frederick L. Brancati, MD, MHS

Sharon Cappelli

Jeanne M. Clark, MD

Jeanne B. Charleston, RN, MSN

Janice Freel

Katherine Horak, RD

Alicia Greene

Dawn Jiggetts

Deloris Johnson

Hope Joseph

Kimberly Loman

Nestoras Mathioudakis, MD, MHS

Henry Mosley

John Reusing

Richard R. Rubin, PhD

Alafia Samuels, MD

Thomas Shields

Shawne Stephens

Kerry J. Stewart, EdD

LeeLana Thomas

\* denotes Principal Investigator

\*\* denotes Program Coordinator

**DPP, DPPOS 1, DPPOS 2 & DPPOS 3A Research Group**  
(1996-2021)

Evonne Utsey

Paula Williamson

**University of New Mexico (Albuquerque, NM)**

David S. Schade, MD\*

Karwyn S. Adams, RN, MSN\*\*

Janene L. Canady, RN, CDE\*\*

Carolyn Johannes, RN, CDE\*\*

Claire Hemphill, RN, BSN\*\*

Penny Hyde, RN, BSN\*\*

Leslie F. Adler, PhD

Patrick J. Boyle, MD

Mark R. Burge, MD

Lisa Chai, RN

Kathleen Colleran, MD

Ateka Fondino

Ysela Gonzales

Doris A. Hernandez-McGinnis

Patricia Katz, LPN

Carolyn King, Med

Julia Middendorf, RN

Amer Rassam, MD

Sofya Rubinchik, MD

Willette Senter, RD

Debra Waters, PhD

**Albert Einstein College of Medicine (Bronx, NY)**

Jill Crandall, MD\*

Harry Shamoon, MD\*

Janet O. Brown, RN, MPH, MSN\*\*

Gilda Trandafirescu, MD\*\*

Danielle Powell, MPH\*\*

Norica Tomuta, MD

Elsie Adorno, BS

Liane Cox, MS, RD

Helena Duffy, MS, C-ANP

Samuel Engel, MD

Allison Friedler, BS

Angela Goldstein, FNP-C, NPP, CSW

Crystal J. Howard-Century, MA

Jennifer Lukin, BA

Stacey Kloiber, RN

Nadege Longchamp, LPN

Helen Martinez, RN, MSN, FNP-C

Dorothy Pompei, BA

Jonathan Scheindlin, MD

Elissa Violino, RD, MS

Elizabeth A. Walker PhD, RN

Judith Wylie-Rosett, EdD, RD

Elise Zimmerman, RD, MS

Joel Zonszein, MD

**University of Pittsburgh (Pittsburgh, PA)**

Trevor Orchard, MD\*

Elizabeth Venditti, PhD\*

Rena R. Wing, PhD\*

Susan Jeffries, RN, MSN\*\*

Gaye Koenning, MS, RD\*\*

M. Kaye Kramer, BSN, MPH\*\*

Marie Smith, RN, BSN\*\*

Susan Barr, BS

Catherine Benchoff

Miriam Boraz, PhD

Lisa Clifford, BS

Rebecca Culyba, BS

Marlene Frazier

Ryan Gilligan, BS

Stephanie Guimond, BS

Susan Harrier, MLT

Louann Harris, RN

Andrea Kriska, PhD

Qurashia Manjoo, MD

Monica Mullen, MHP, RD

Alicia Noel, BS

Amy Otto, PhD

Jessica Pettigrew, CMA

Bonny Rockette-Wagner, PhD

Debra Rubinstein, MD

Linda Semler, MS, RD

Cheryl F. Smith, PhD

Valarie Weinzierl, MPH

Katherine V. Williams, MD, MPH

Tara Wilson, BA

Bonnie Gillis, MS, RD, LDN

**University of Hawaii (Honolulu, HI)**

Marjorie K. Mau, MD\*

Narleen K. Baker-Ladao, BS\*\*

John S. Melish, MD

Richard F. Arakaki, MD\*

Renee W. Latimer, BSN, MPH\*\*

Mae K. Isonaga, RD, MPH\*\*

Ralph Beddow, MD

Nina E. Bermudez, MS

Lorna Dias, AA

Jillian Inouye, RN, PhD

Kathy Mikami, BS, RD

Pharis Mohideen, MD

Sharon K. Odom, RD, MPH

Raynette U. Perry, AA

Robin E. Yamamoto, CDE, RD

\* denotes Principal Investigator

\*\* denotes Program Coordinator

**DPP, DPPOS 1, DPPOS 2 & DPPOS 3A Research Group**  
(1996-2021)

**Southwest American Indian Centers**  
**(Phoenix, AZ; Shiprock, NM; Zuni, NM)**

William C. Knowler, MD, DrPH\*+  
Robert L. Hanson, MD, MPH\*  
Harelda Anderson, LMSW\*\*  
Norman Coeeyate\*\*  
Charlotte Dodge\*\*  
Mary A. Hoskin, RD, MS\*\*  
Carol A. Percy, RN, MS\*\*  
Alvera Enote\*\*  
Camille Natewa\*\*  
Kelly J. Acton, MD, MPH  
Vickie L. Andre, RN, FNP  
Rosalyn Barber  
Shandiin Begay, MPH  
Peter H. Bennett, MB, FRCP  
Mary Beth Benson, RN, BSN  
Evelyn C. Bird, RD, MPH  
Brenda A. Broussard, RD, MPH, MBA, CDE  
Brian C. Bucca, OD, FAAO  
Marcella Chavez, RN, AS  
Sherron Cook  
Jeff Curtis, MD  
Tara Dacawyma  
Matthew S. Doughty, MD  
Roberta Duncan, RD  
Cyndy Edgerton, RD  
Jacqueline M. Ghahate  
Justin Glass, MD  
Martia Glass, MD  
Dorothy Gohdes, MD  
Wendy Grant, MD  
Ellie Horse  
Louise E. Ingraham, MS, RD, LN  
Merry Jackson  
Priscilla Jay  
Roylen S. Kaskalla  
Karen Kavena, ANP  
David Kessler, MD  
Kathleen M. Kobus, RNC-ANP  
Jonathan Krakoff, MD  
Jason Kurland, MD  
Catherine Manus, LPN  
Cherie McCabe  
Sara Michaels, MD  
Tina Morgan  
Yolanda Nashboo  
Julie A. Nelson, RD  
Steven Poirier, MD  
Evette Polczynski, MD  
Christopher Piromalli, DO

Mike Reidy, MD  
Jeanine Roumain, MD, MPH  
Debra Rowse, MD  
Robert J. Roy  
Sandra Sangster, RD  
Janet Sewenemewa  
Miranda Smart  
Chelsea Spencer  
Darryl Tonemah, PhD  
Rachel Williams, FNP  
Charlton Wilson, MD  
Michelle Yazzie

**George Washington University Biostatistics**  
**Center (DPP Coordinating Center Rockville,**  
**MD)**

Raymond Bain, PhD\*  
Sarah Fowler, PhD\*  
Marinella Temprosa, PhD\*  
Michael D. Larsen, PhD\*  
Kathleen Jablonski, PhD\*  
Tina Brenneman\*\*  
Sharon L. Edelstein, ScM\*\*  
Solome Abebe, MS  
Julie Bamdad, MS  
Melanie Barkalow  
Joel Bethupu  
Tsedenia Bezabeh  
Anna Bowers  
Nicole Butler  
Jackie Callaghan  
Caitlin E. Carter  
Costas Christophi, PhD  
Gregory M. Dwyer, MPH  
Mary Foulkes, PhD  
Yuping Gao  
Robert Gooding  
Adrienne Gottlieb  
Kristina L. Grimes  
Nisha Grover-Fairchild, MPH  
Lori Haffner, MS  
Heather Hoffman, PhD  
Steve Jones  
Tara L. Jones  
Richard Katz, MD  
Preethy Kolinjivadi, MS  
John M. Lachin, ScD  
Yong Ma, PhD  
Pamela Mucik  
Robert Orlosky  
Qing Pan, PhD  
Susan Reamer

\* denotes Principal Investigator

\*\* denotes Program Coordinator

**DPP, DPPOS 1, DPPOS 2 & DPPOS 3A Research Group**  
(1996-2021)

James Rochon, PhD

Alla Sapozhnikova

Hanna Sherif, MS

Charlotte Stimpson

Ashley Hogan Tjaden, MPH

Fredricka Walker-Murray

Audrey McMaster

Rhea Mundra

Hannah Rapoport

Nolan Kuenster

**Lifestyle Resource Core**

Elizabeth M. Venditti, PhD\*

Andrea M. Kriska, PhD

Linda Semler, MS, RD, LDN

Valerie Weinzierl, MPH

**Central Biochemistry Laboratory (Seattle, WA)**

Santica Marcovina, PhD, ScD\*

F. Alan Aldrich\*\*

Jessica Harting\*\*

John Albers, PhD

Greg Strlewicz, PhD

**Central Biochemistry Laboratory**

**(Minneapolis, MN)**

Robert Janicek, MT, CLS\*

Anthony Killeen, MD, PhD

Deanna Gabrielson, MLS (ASCP)<sup>CM</sup>, PMP

**NIH/NIDDK (Bethesda, MD)**

R. Eastman, MD

Judith Fradkin, MD

Sanford Garfield, PhD

Christine Lee, MD, MS

**Centers for Disease Control & Prevention**

**(Atlanta, GA)**

Edward Gregg, PhD

Ping Zhang, PhD

**Carotid Ultrasound**

Dan O'Leary, MD\*

Gregory Evans

**Coronary Artery Calcification Reading Center**

Matthew Budoff, MD

Chris Dailing

**CT Scan Reading Center**

Elizabeth Stamm, MD\*

**Dual Energy X-ray Absorptiometry Reading**

**Center (San Francisco, CA)**

Ann Schwartz, PhD

Caroline Navy

Lisa Palermo, MS

**Epidemiological Cardiology Research Center-**

**Epicare (Winston-Salem, NC)**

Pentti Rautaharju, MD, PhD\*

Ronald J. Prineas, MD, PhD\*\*

Teresa Alexander

Charles Campbell, MS

Sharon Hall

Yabing Li, MD

Margaret Mills

Nancy Pemberton, MS

Farida Rautaharju, PhD

Zhuming Zhang, MD

Elsayed Z. Soliman, MD\*

Julie Hu, MSc

Susan Hensley, BS

Lisa Keasler

Tonya Taylor

**Fundus Photo Reading Center (Madison, WI)**

Barbara Blodi, MD\*

Ronald Danis, MD\*

Matthew Davis, MD\*

Larry Hubbard\*

Ryan Endres\*\*

Deborah Elsas\*\*

Samantha Johnson\*\*

Dawn Myers\*\*

Nancy Barrett

Heather Baumhauer

Wendy Benz

Holly Cohn

Ellie Corkery

Kristi Dohm

Amitha Domalpally, MD, PhD

Vonnie Gama

Anne Goulding

Andy Ewen

Cynthia Hurtenbach

Daniel Lawrence

Kyle McDaniel

Jeong Pak

James Reimers

Ruth Shaw

Maria Swift

Pamela Vargo, CRA

Sheila Watson

**Neurocognitive Assessment Group**

Jose A. Luchsinger, MD, MPH

Jennifer Manly, PhD

**Nutrition Coding Center (Columbia, SC)**

Elizabeth Mayer-Davis, PhD\*

Robert R. Moran, PhD\*\*

\* denotes Principal Investigator

\*\* denotes Program Coordinator

**DPP, DPPOS 1, DPPOS 2 & DPPOS 3A Research Group**  
(1996-2021)

**Quality of Well-Being Center (La Jolla, CA)**

Ted Ganiats, MD\*  
Kristin David, MHP\*  
Andrew J. Sarkin, PhD\*  
Erik Groessl, PhD  
Naomi Katzir  
Helen Chong, MA

**University of Michigan (Ann Arbor, MI)**

William H. Herman, MD, MPH  
Michael Brändle, MD, MS  
Morton B. Brown, PhD

**+Genetics Working Group**

Jose C. Florez, MD, PhD<sup>1, 2</sup>  
David Altshuler, MD, PhD<sup>1, 2</sup>  
Liana K. Billings, MD<sup>1</sup>  
Ling Chen, MS<sup>1</sup>  
Maegan Harden, BS<sup>2</sup>  
Robert L. Hanson, MD, MPH<sup>3</sup>  
William C. Knowler, MD, DrPH<sup>3</sup>  
Toni I. Pollin, PhD<sup>4</sup>  
Alan R. Shuldiner, MD<sup>4</sup>  
Kathleen Jablonski, PhD<sup>5</sup>  
Paul W. Franks, PhD, MPhil, MS<sup>6, 7, 8</sup>  
Marie-France Hivert, MD<sup>8</sup>

1=Massachusetts General Hospital  
2=Broad Institute  
3=NIDDK  
4=University of Maryland  
5=Coordinating Center  
6=Lund University, Sweden  
7=Umeå University, Sweden  
8=Harvard School of Public Health

\* denotes Principal Investigator  
\*\* denotes Program Coordinator
